# Supplementary material for: Synthesis, Fluorine-18 Radiolabeling, and In Vivo PET Imaging of a Hydrophilic Fluorosulfotetrazine
Source: MDPI journal article supplement (doi:10.3390/ph16050636), 2023-04-22
Supplement: s1 [file s1]

# Synthesis, Fluorine-18 Radiolabeling, and In Vivo PET Imaging of a Hydrophilic Fluorosulfotetrazine

Jason Beaufrez <sup>1,2</sup>, Stéphane Guillouet <sup>1</sup>, Yann Seimbille <sup>2</sup> and Cécile Perrio <sup>1,\*</sup>

<sup>1</sup> UAR 3408, CNRS, CEA, Unicaen, Cyceron, Bd Henri Becquerel, 14074 Caen, France

<sup>2</sup> Department of Radiology & Nuclear Medicine, Erasmus MC, University Medical Center Rotterdam, Wytemaweg 80, 3015 CN Rotterdam, The Netherlands

\* Correspondence: perrio@cyceron.fr

|                                                                                    |              |
|------------------------------------------------------------------------------------|--------------|
| <b>Figure S1.</b> <sup>1</sup> H NMR spectrum of compound <b>3</b>                 | <b>p.S2</b>  |
| <b>Figure S2.</b> <sup>13</sup> C NMR spectrum of compound <b>3</b>                | <b>p.S2</b>  |
| <b>Figure S3.</b> MS and HRMS analysis of compound <b>3</b>                        | <b>p.S3</b>  |
| <b>Figure S4.</b> <sup>1</sup> H NMR spectrum of compound <b>4</b>                 | <b>p.S3</b>  |
| <b>Figure S5.</b> <sup>13</sup> C NMR spectrum of compound <b>4</b>                | <b>p.S4</b>  |
| <b>Figure S6.</b> <sup>19</sup> F NMR spectrum of compound <b>4</b>                | <b>p.S4</b>  |
| <b>Figure S7.</b> MS and HRMS analysis of compound <b>4</b>                        | <b>p.S5</b>  |
| <b>Figure S8.</b> <sup>1</sup> H NMR spectrum of compound <b>6</b>                 | <b>p.S5</b>  |
| <b>Figure S9.</b> <sup>13</sup> C NMR spectrum of compound <b>6</b>                | <b>p.S6</b>  |
| <b>Figure S10.</b> MS and HRMS analysis of compound <b>6</b>                       | <b>p.S6</b>  |
| <b>Figure S11.</b> <sup>1</sup> H NMR spectrum of compound <b>7</b>                | <b>p.S7</b>  |
| <b>Figure S12.</b> <sup>13</sup> C NMR spectrum of compound <b>7</b>               | <b>p.S7</b>  |
| <b>Figure S13.</b> MS and HRMS analysis of compound <b>7</b>                       | <b>p.S8</b>  |
| <b>Figure S14.</b> <sup>1</sup> H NMR spectrum of compound <b>8</b>                | <b>p.S8</b>  |
| <b>Figure S15.</b> <sup>13</sup> C NMR spectrum of compound <b>8</b>               | <b>p.S9</b>  |
| <b>Figure S16.</b> MS and HRMS analysis of compound <b>8</b>                       | <b>p.S9</b>  |
| <b>Figure S17.</b> <sup>1</sup> H NMR spectrum of compound <b>1</b>                | <b>p.S10</b> |
| <b>Figure S18.</b> <sup>13</sup> C NMR spectrum of compound <b>1</b>               | <b>p.S10</b> |
| <b>Figure S19.</b> <sup>19</sup> F NMR spectrum of compound <b>1</b>               | <b>p.S11</b> |
| <b>Figure S20.</b> MS and HRMS analysis of compound <b>1</b>                       | <b>p.S11</b> |
| <b>Figure S21.</b> MS analysis of compound <b>10</b>                               | <b>p.S12</b> |
| <b>Figure S22.</b> RadioTLC analysis of crude compound [ <sup>18</sup> F] <b>4</b> | <b>p.S12</b> |
| <b>Figure S23.</b> HPLC analysis of crude compound [ <sup>18</sup> F] <b>4</b>     | <b>p.S13</b> |

<sup>1</sup>H NMR (16 scans, 500.13 MHz, 294.6 K, CDCl<sub>3</sub>)

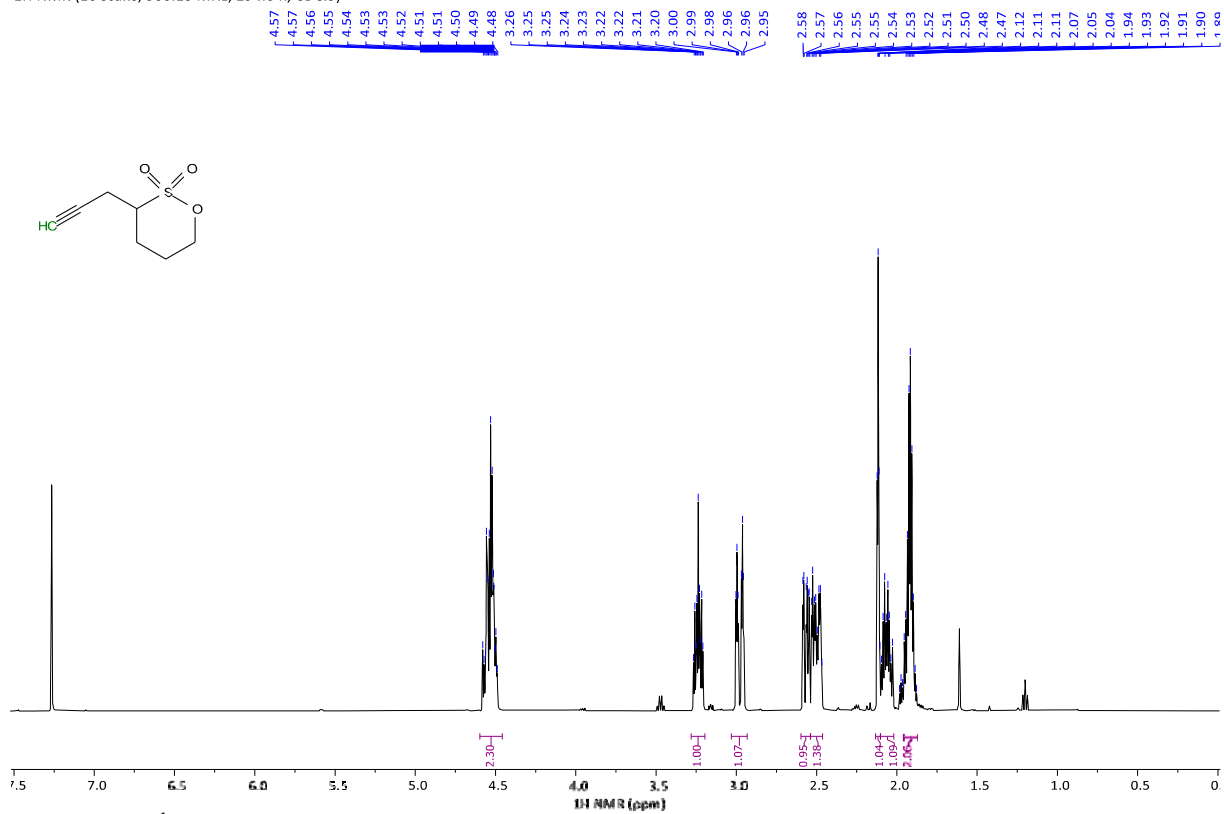

Figure S1. <sup>1</sup>H NMR spectrum of compound 3.

<sup>13</sup>C NMR (128 scans, 125.76 MHz, 295.8 K, CDCl<sub>3</sub>)

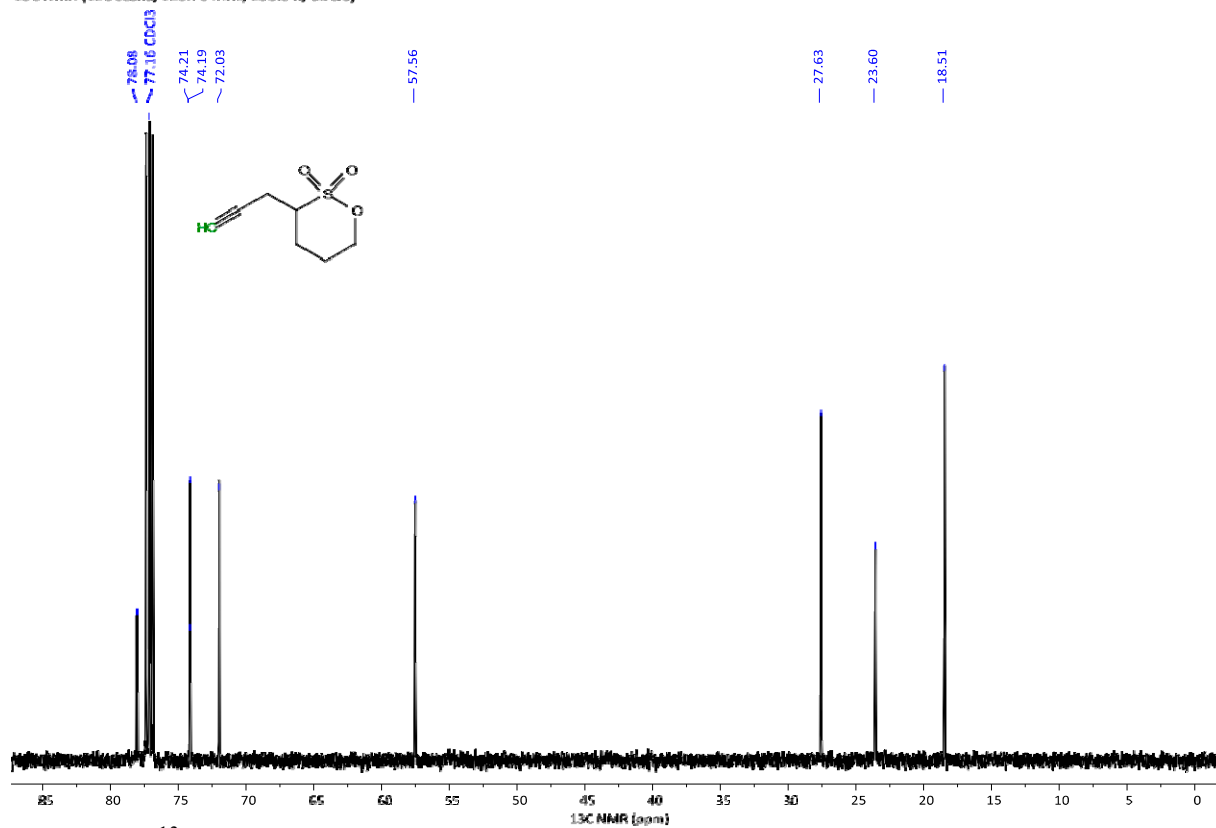

Figure S2. <sup>13</sup>C NMR spectrum of compound 3.

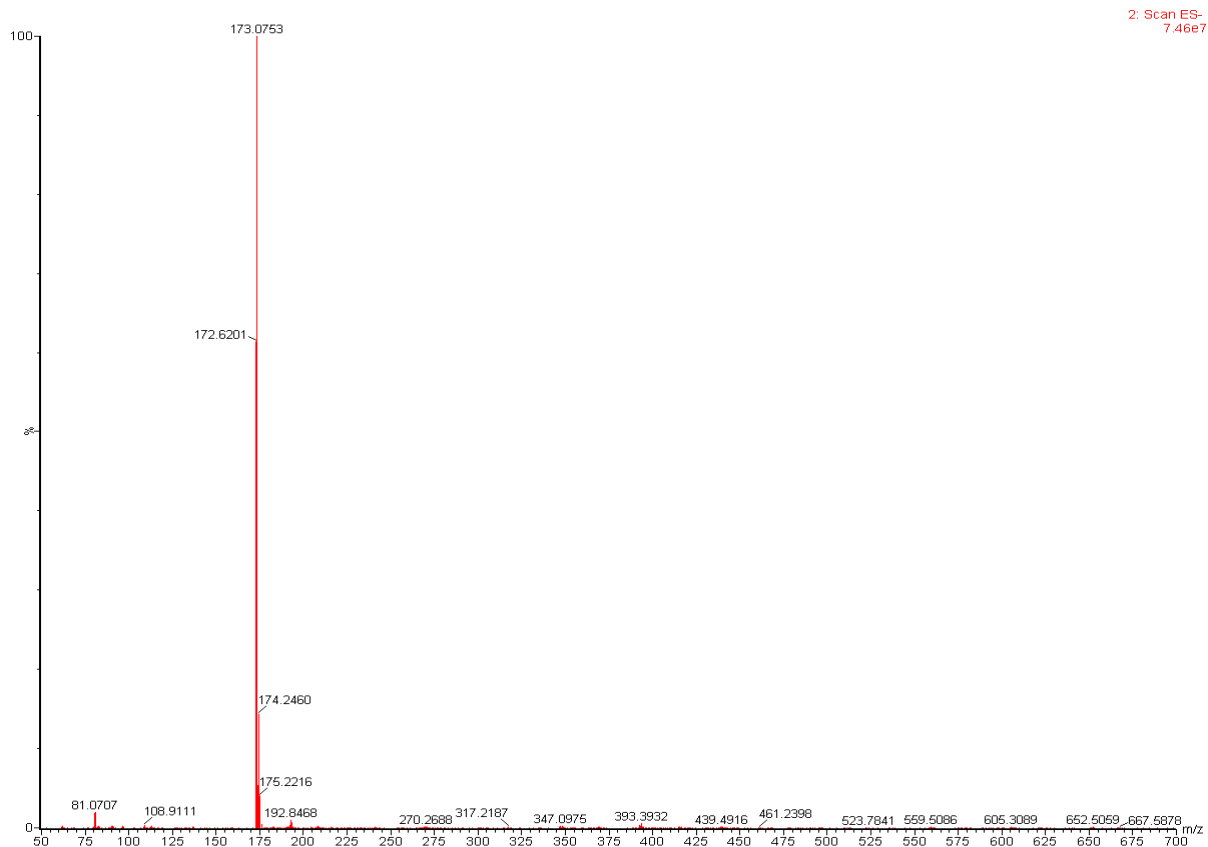

**Figure S3.** MS and HRMS analysis of compound **3**.

<sup>1</sup>H NMR (16 scans, 500.13 MHz, 294.8 K, CDCl<sub>3</sub>)

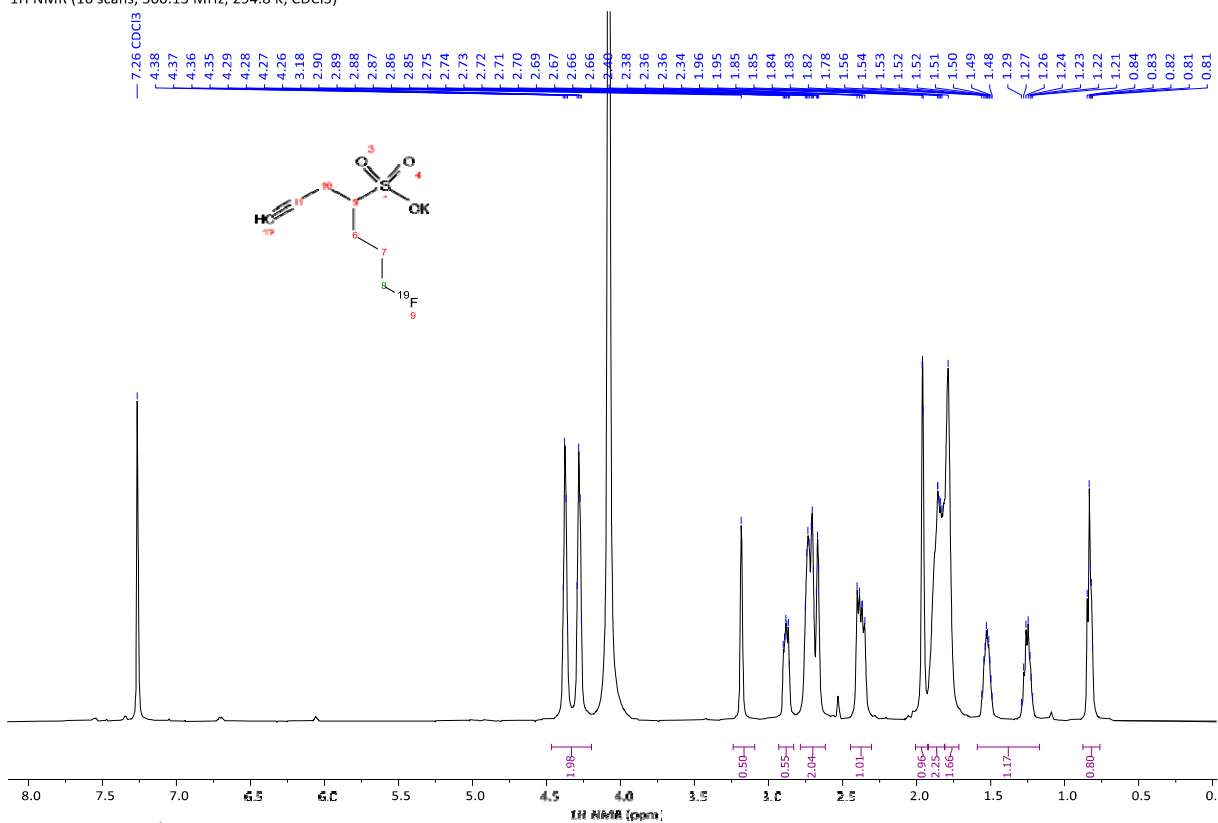

**Figure S4.** <sup>1</sup>H NMR spectrum of compound **4**.

<sup>13</sup>C NMR (176 scans, 124 °F, 400 MHz, 295.3 K, CDCl<sub>3</sub>)

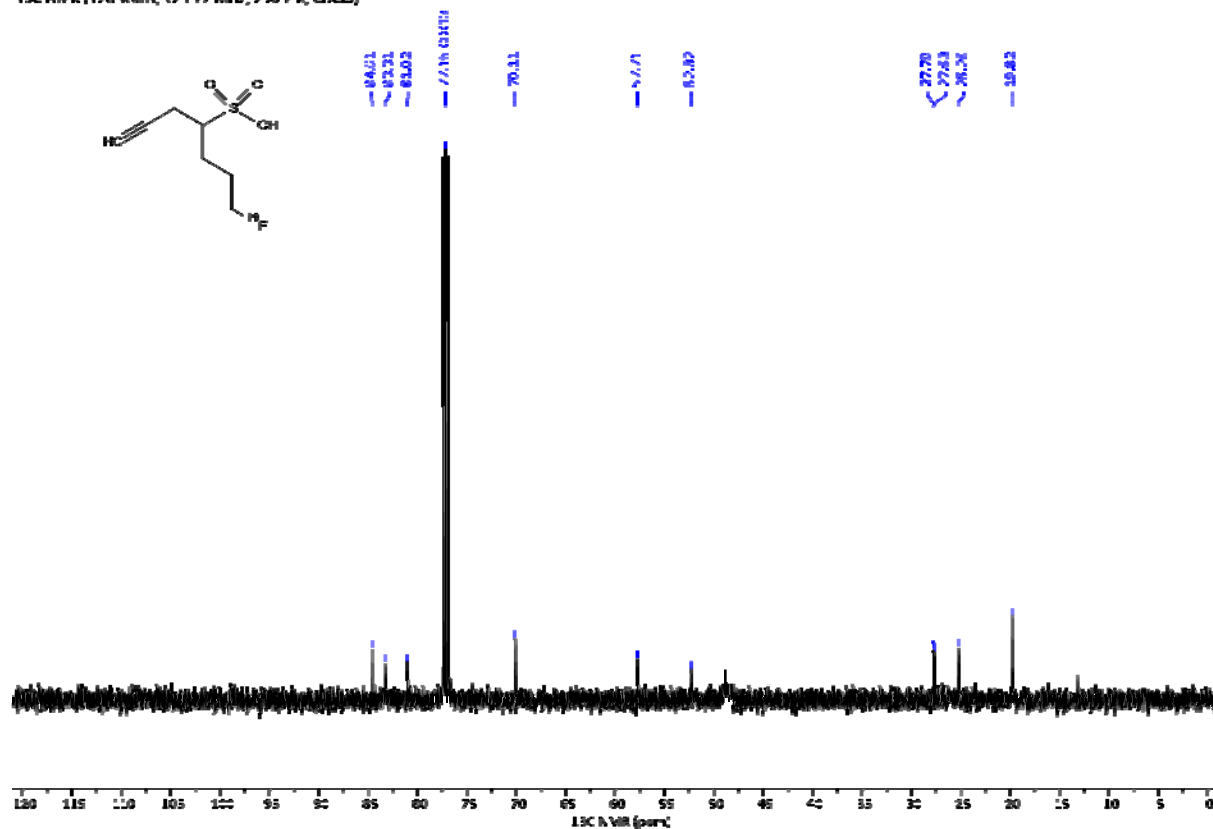

Figure S5. <sup>13</sup>C NMR spectrum of compound 4.

<sup>19</sup>F NMR (64 scans, 470.54 MHz, 295.3 K, CDCl<sub>3</sub>)

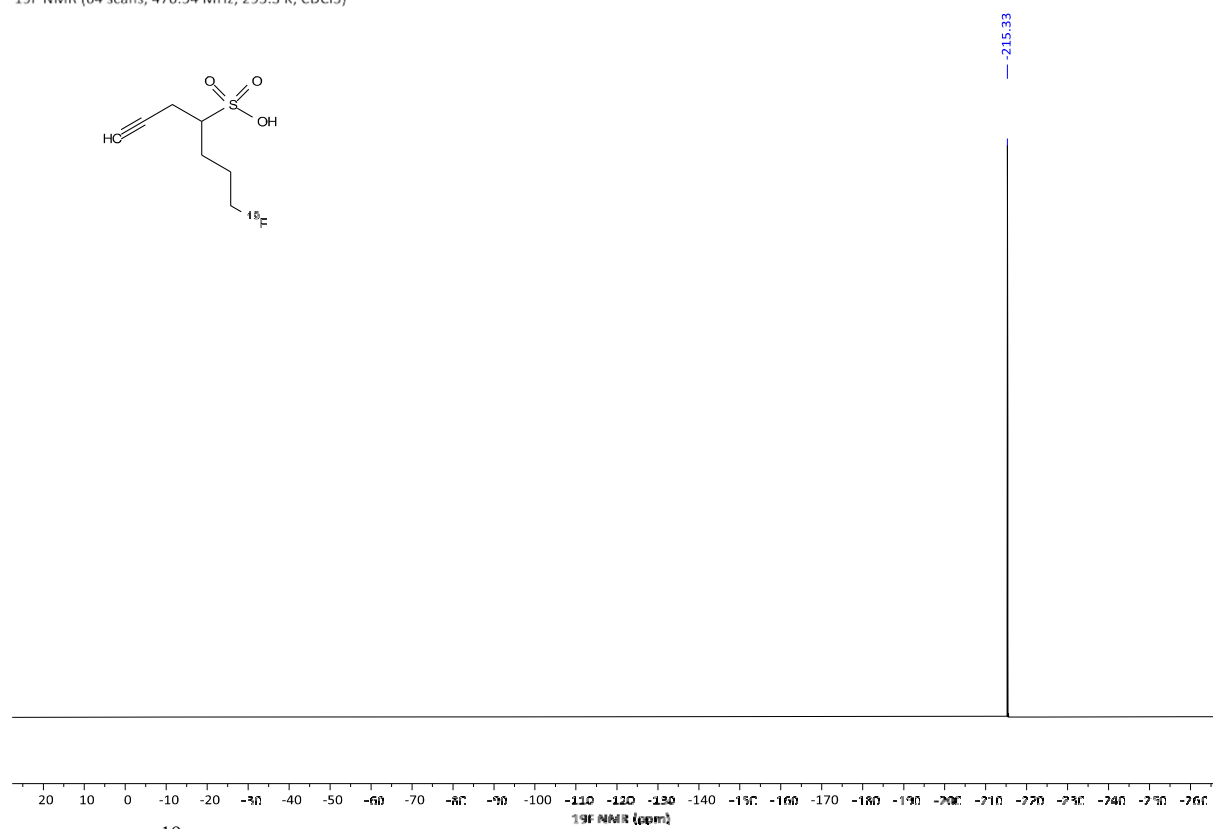

Figure S6. <sup>19</sup>F NMR spectrum of compound 4.

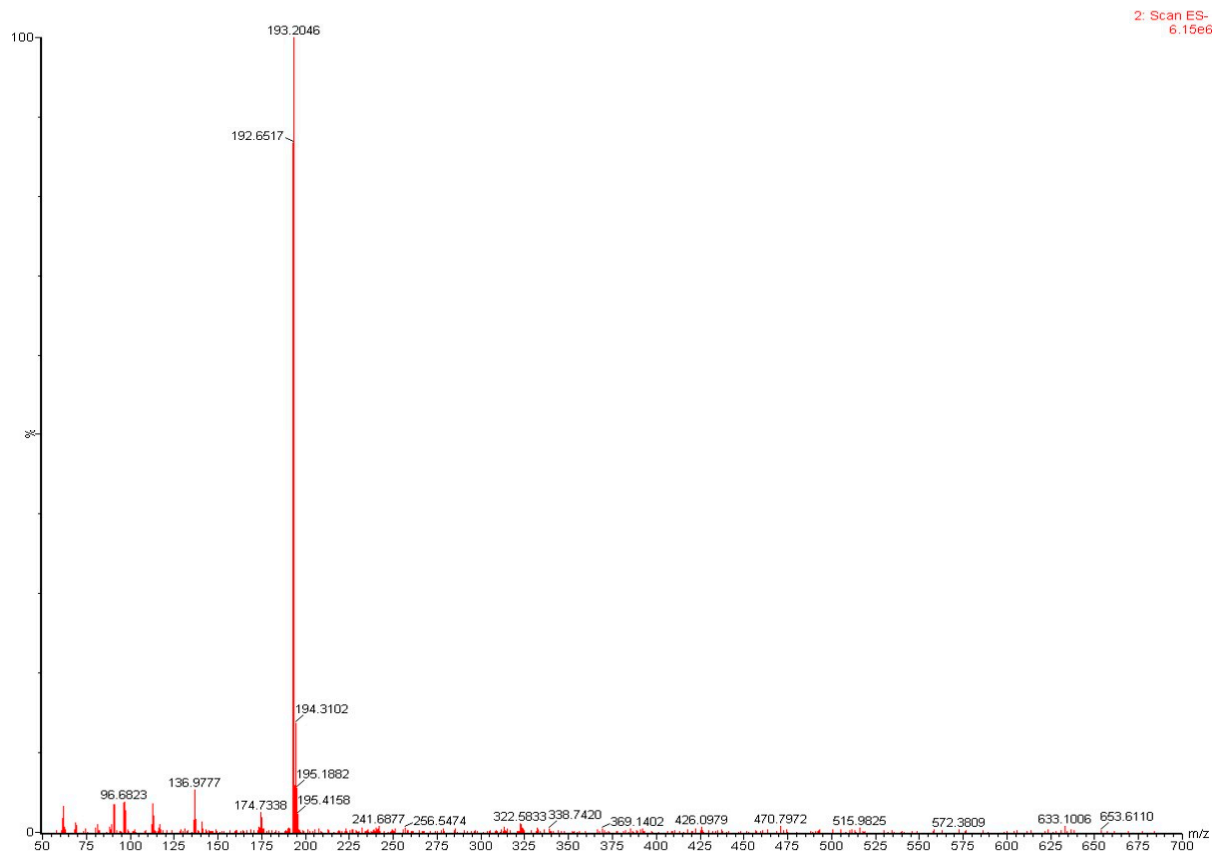

**Figure S7.** MS and HRMS analysis of compound **4**.

<sup>1</sup>H NMR (16 scans, 500.13 MHz, 294.2 K, CDCl<sub>3</sub>)

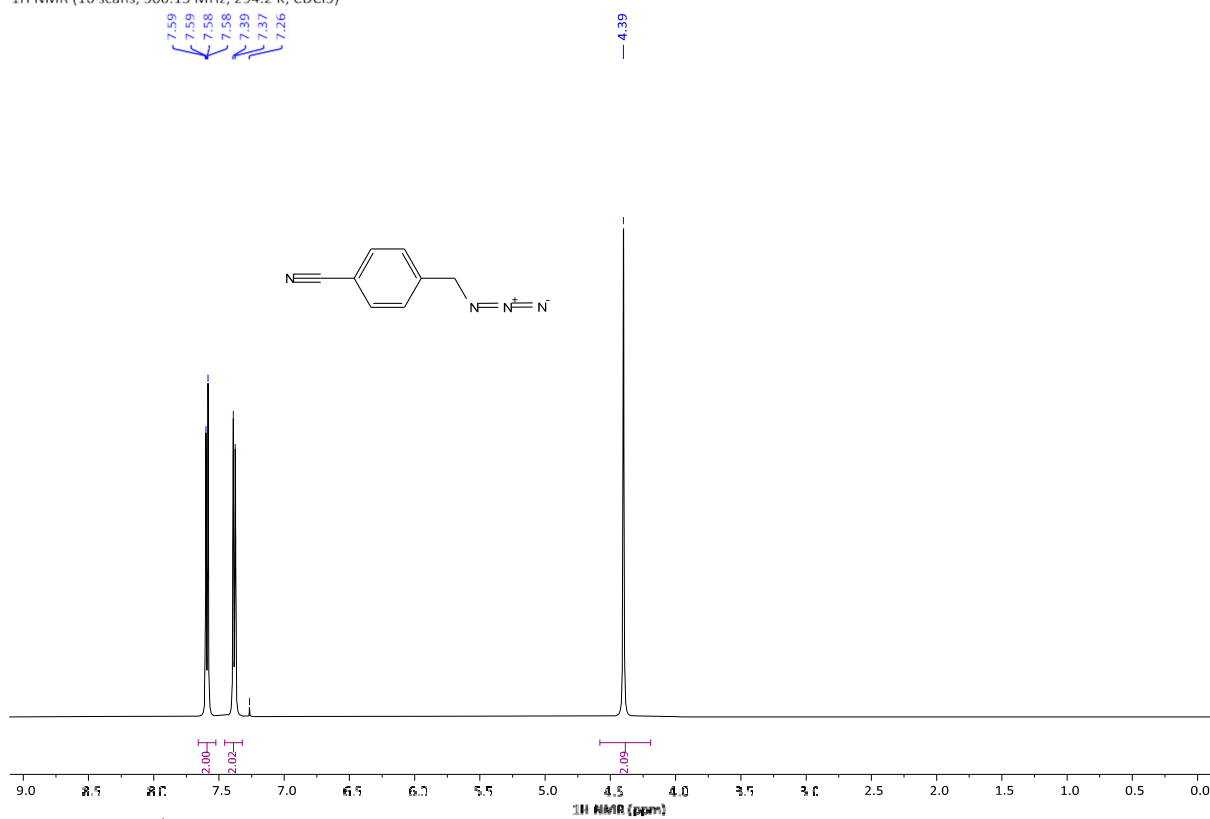

**Figure S8.** <sup>1</sup>H NMR spectrum of compound **6**.

<sup>13</sup>C NMR (128 scans, 125.76 MHz, 295.7 K, CDCl<sub>3</sub>)

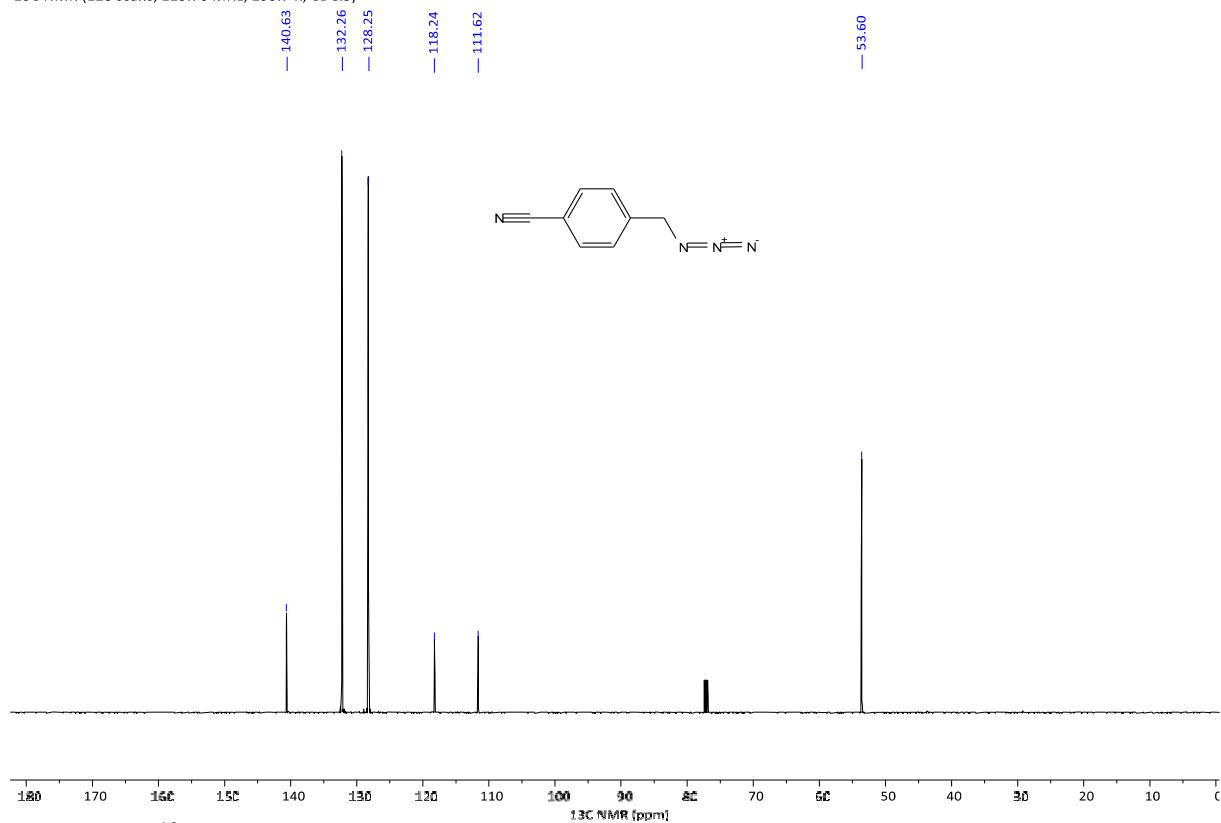

Figure S9. <sup>13</sup>C NMR spectrum of compound 6.

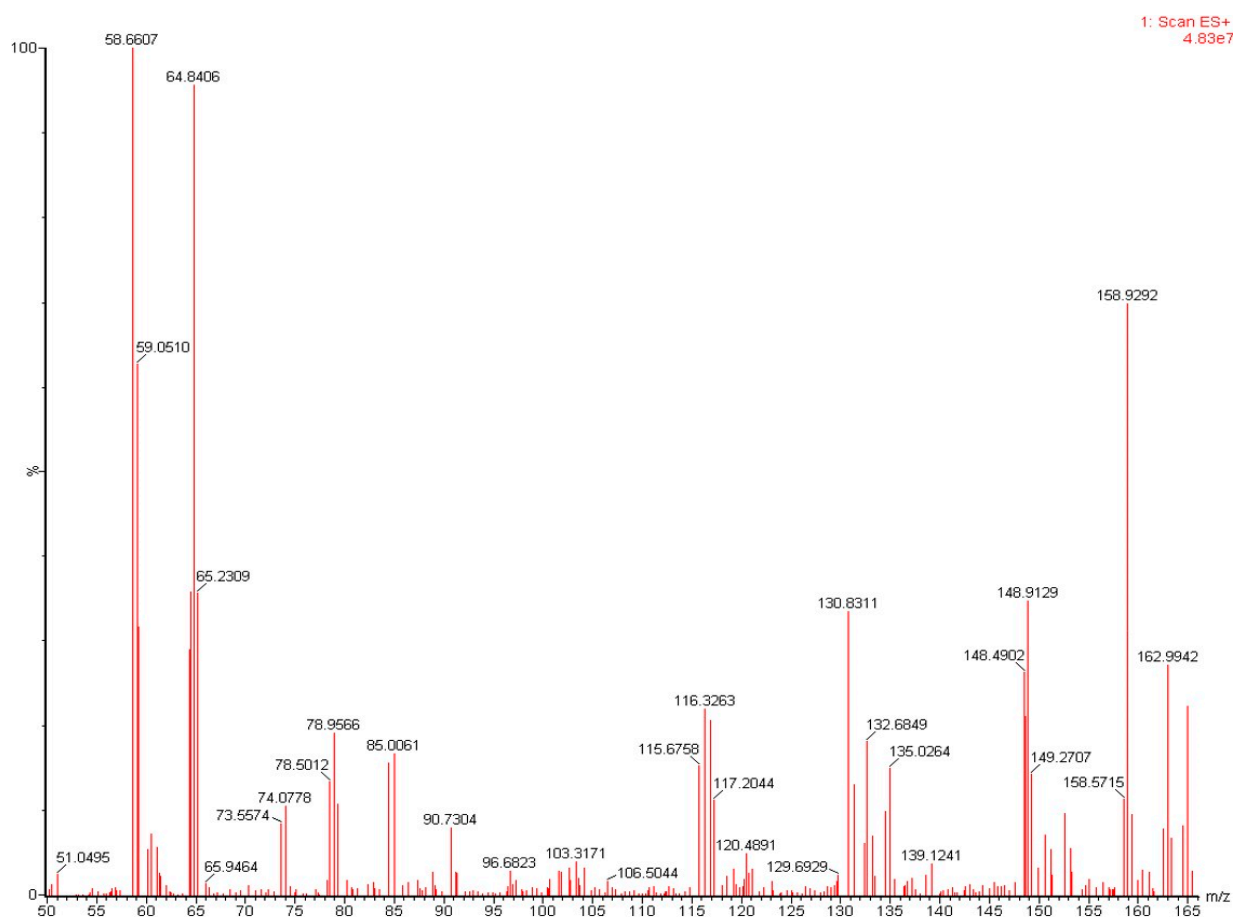

| Mass     | Calc. Mass | mDa   | PPM    | DBE | i-FIT | Norm   | Conf(%) | Formula                                      |
|----------|------------|-------|--------|-----|-------|--------|---------|----------------------------------------------|
| 158.9929 | 159.0671   | -74.2 | -466.7 | 7.5 | 100.0 | 13.900 | 0.00    | C <sub>8</sub> H <sub>7</sub> N <sub>4</sub> |

Figure S10. MS and HRMS analysis of compound 6.

<sup>1</sup>H NMR (16 scans, 500.13 MHz, 293.8 K, CDCl<sub>3</sub>)

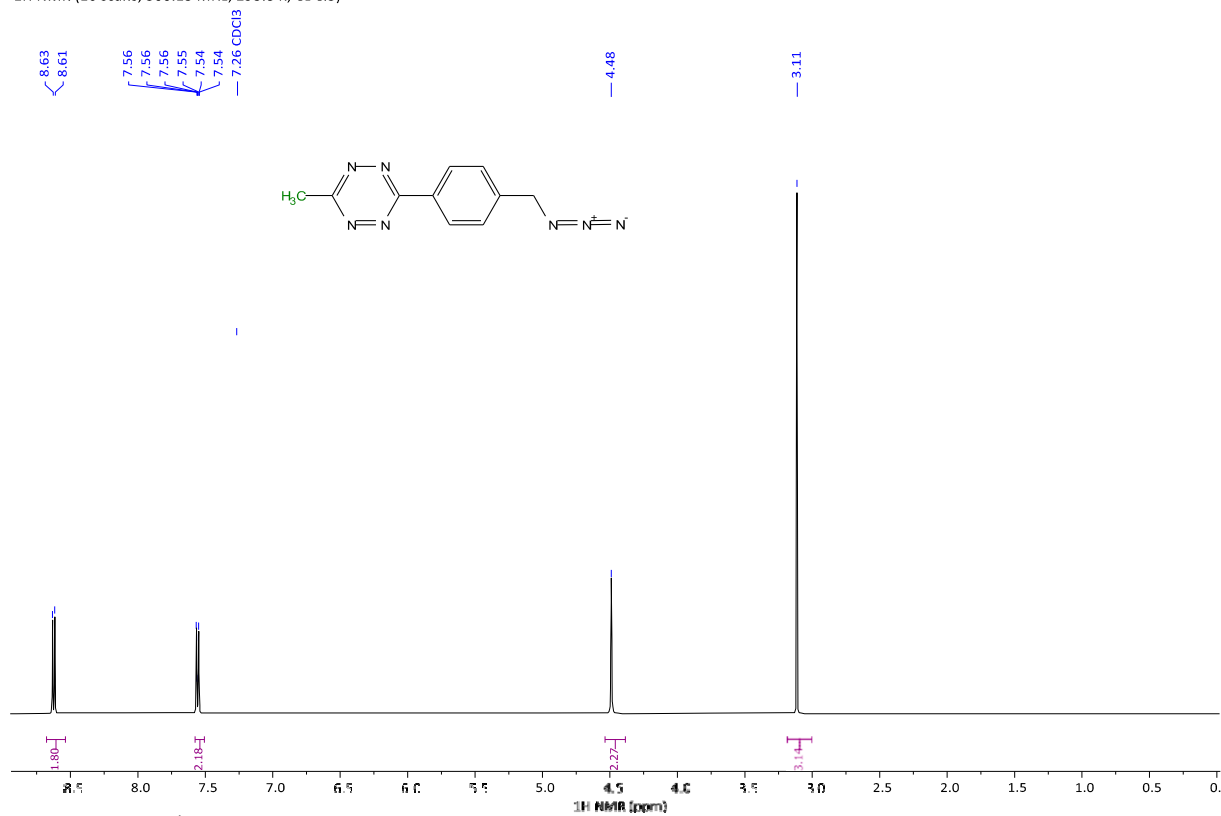

Figure S11. <sup>1</sup>H NMR spectrum of compound 7.

<sup>13</sup>C NMR (1024 scans, 125.77 MHz, 295.8 K, CDCl<sub>3</sub>)

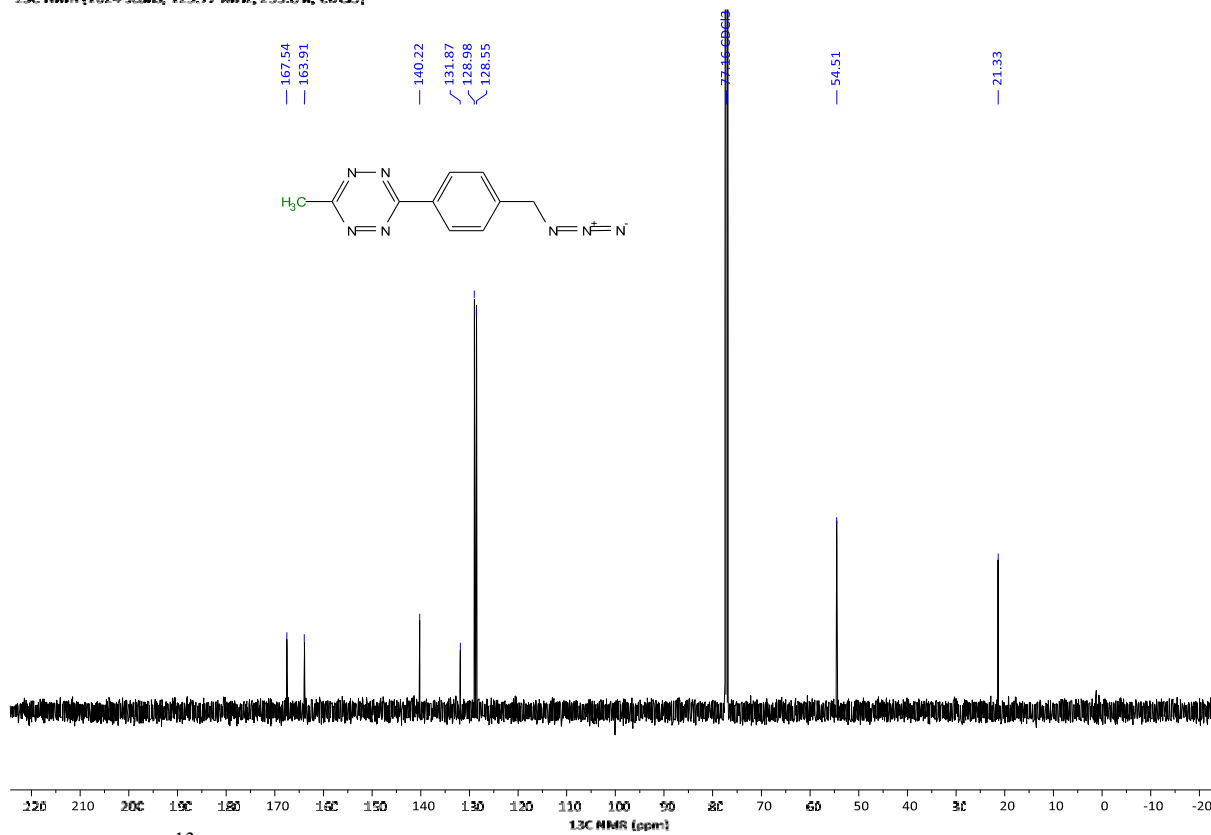

Figure S12. <sup>13</sup>C NMR spectrum of compound 7.

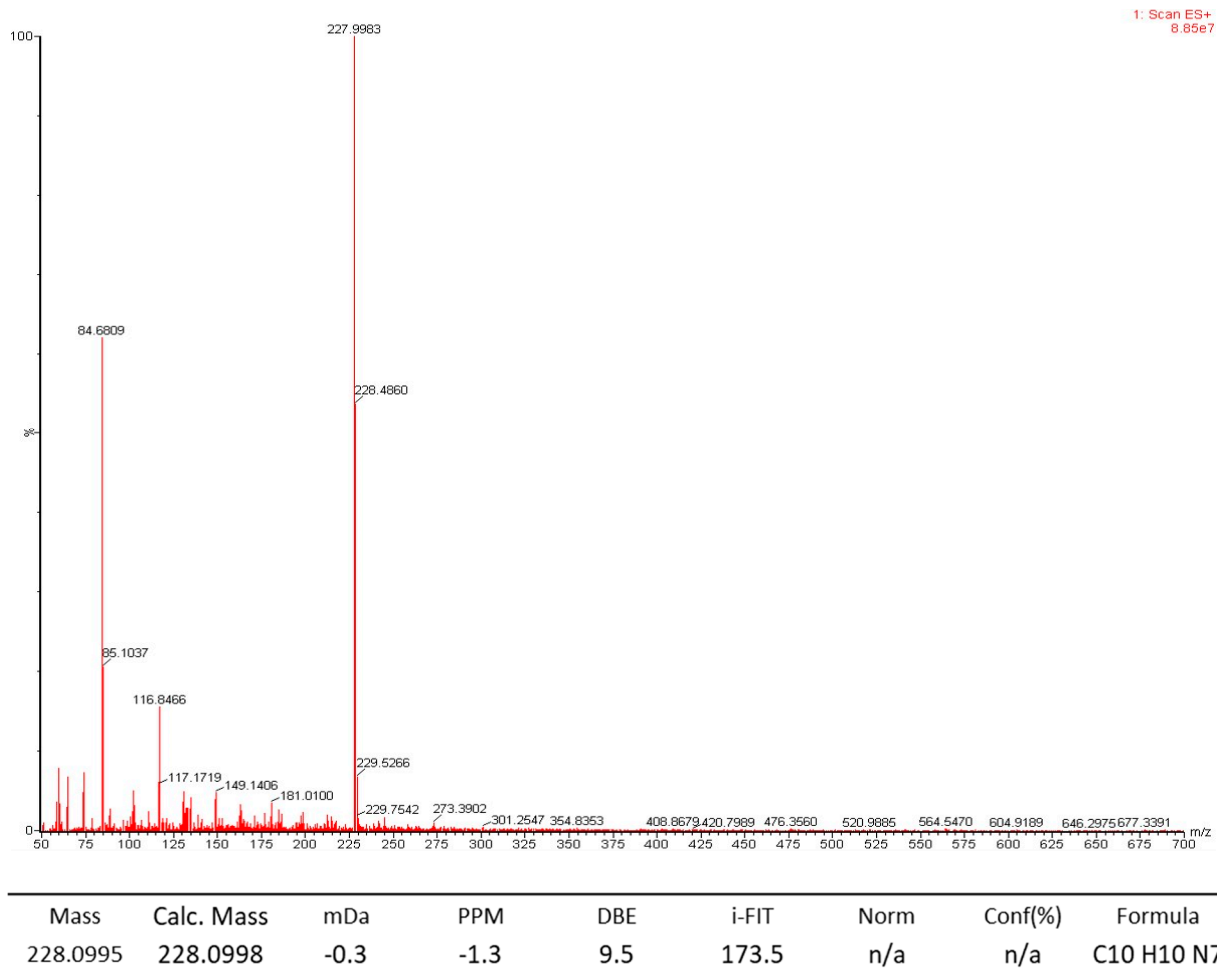

**Figure S13.** MS and HRMS analysis of compound 7.

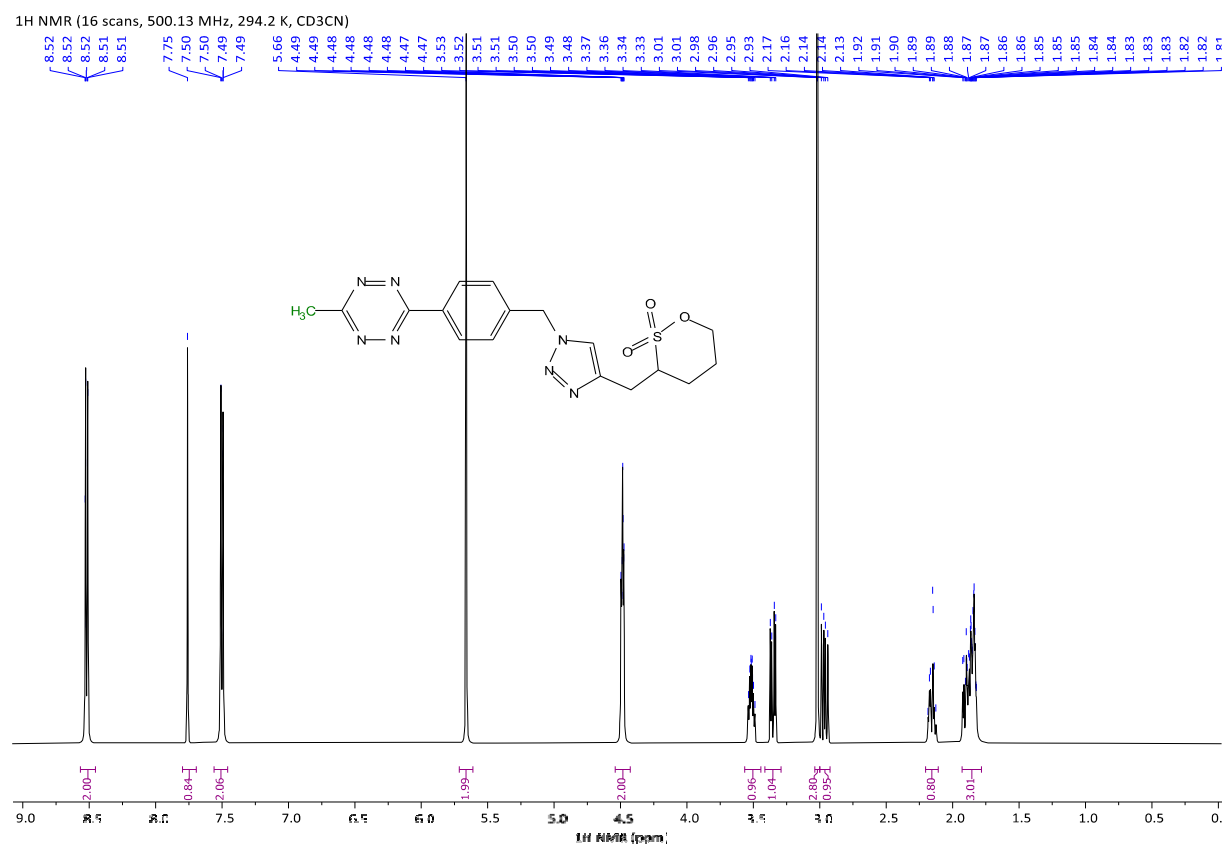

**Figure S14.** <sup>1</sup>H NMR spectrum of compound 8.

<sup>13</sup>C NMR (1024 scans, 125.76 MHz, 295.2 K, CDCl<sub>3</sub>)

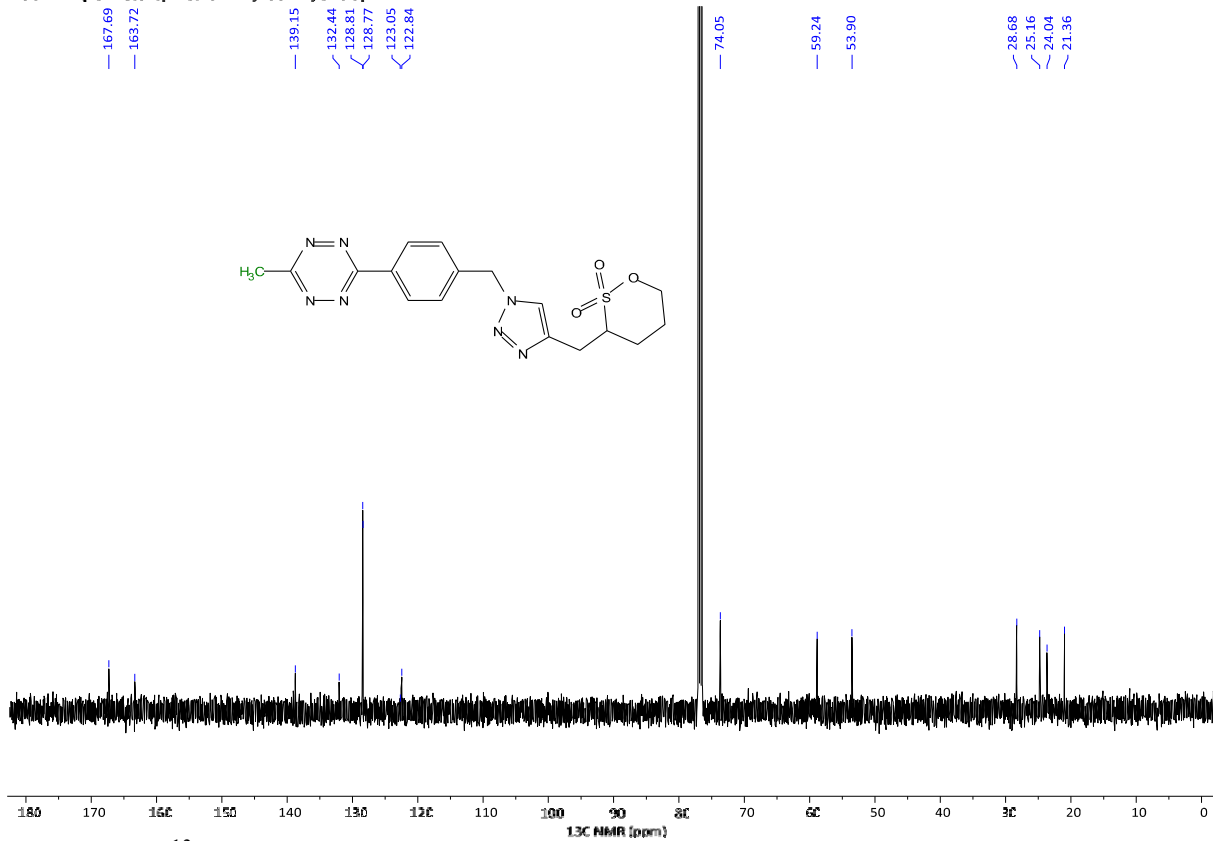

Figure S15. <sup>13</sup>C NMR spectrum of compound 8.

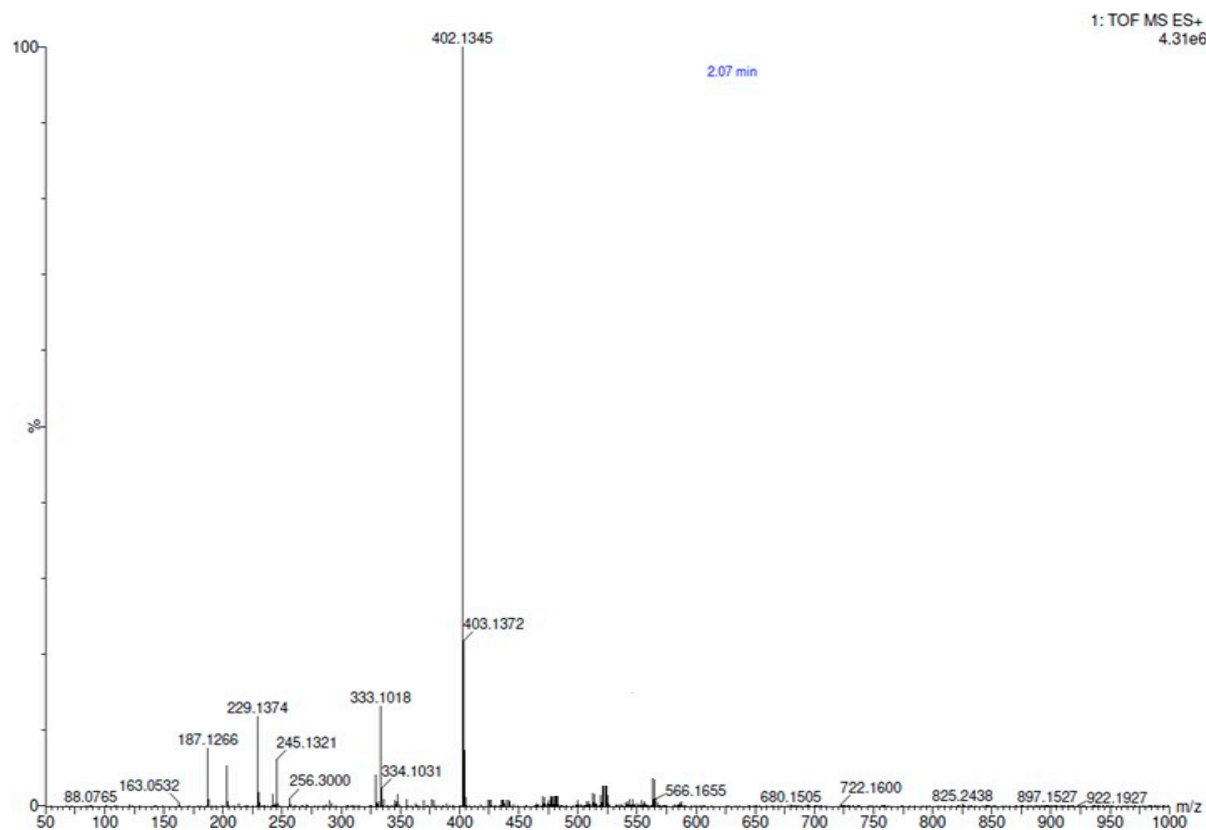

| Mass     | Calc. Mass | mDa  | PPM  | DBE  | i-FIT | Norm | Conf(%) | Formula         |
|----------|------------|------|------|------|-------|------|---------|-----------------|
| 402.1345 | 402.1348   | -0.3 | -0.7 | 11.5 | 220.8 | n/a  | n/a     | C17 H20 N7 O3 S |

Figure S16. MS and HRMS analysis of compound 8.

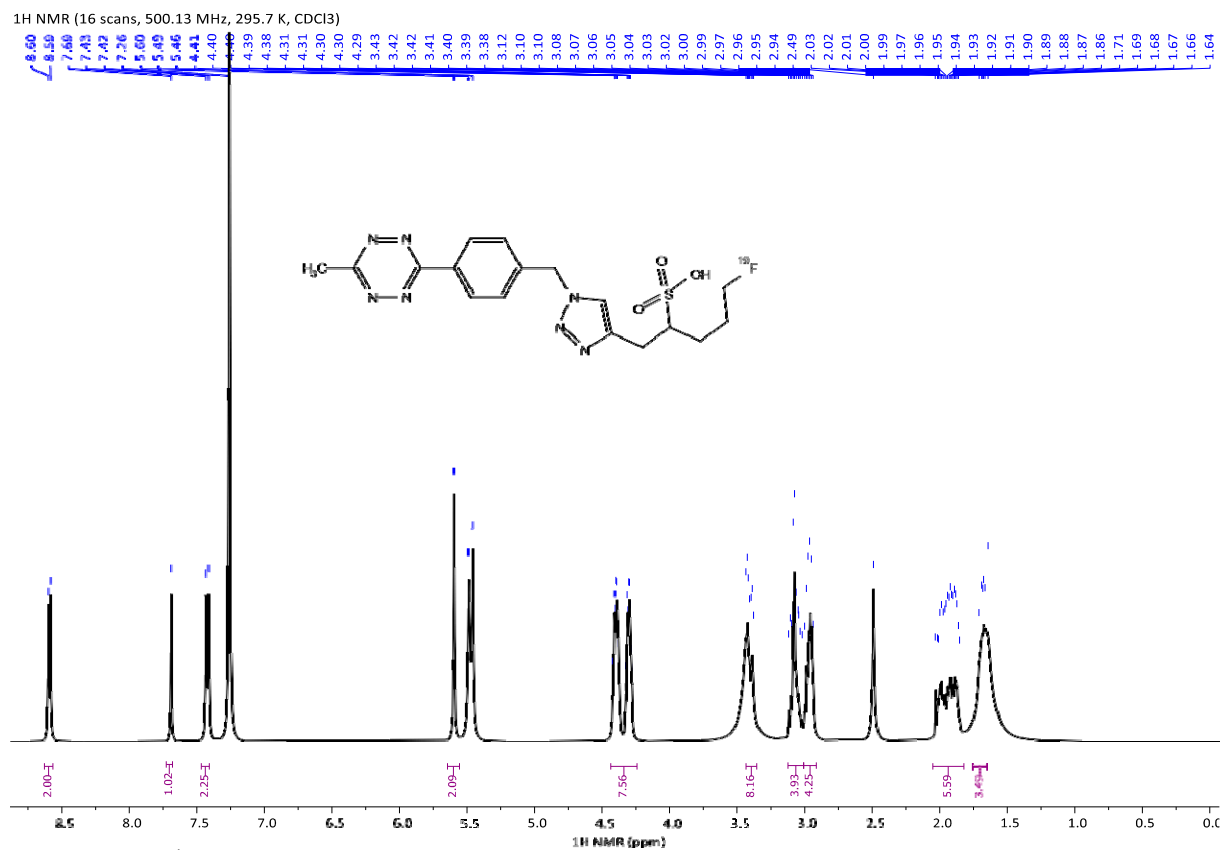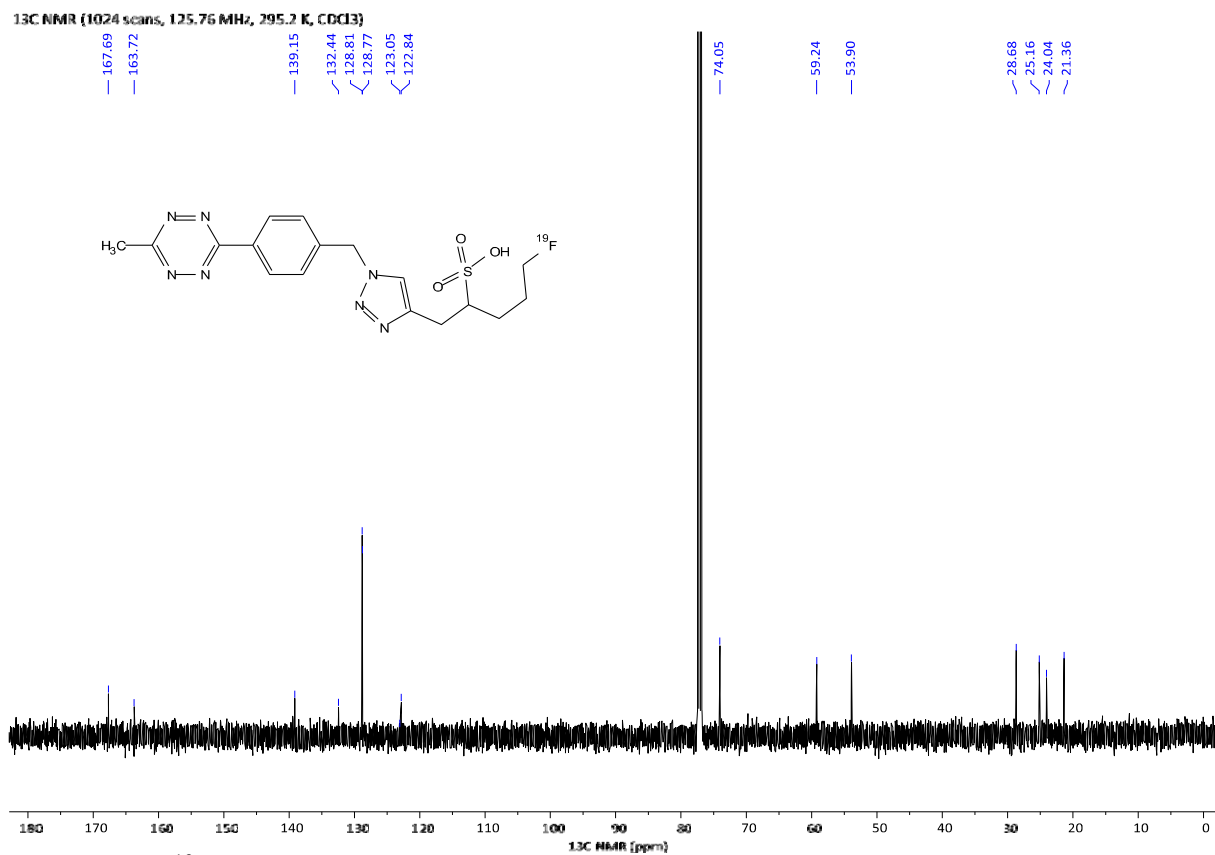

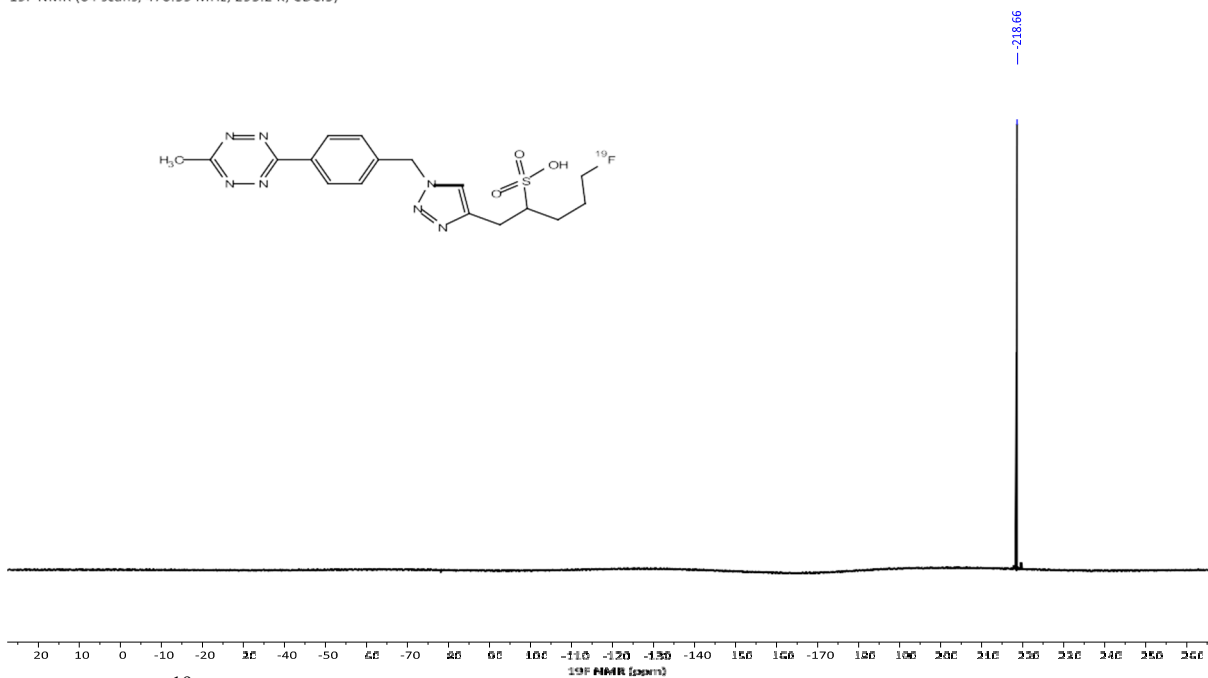

Figure S19. <sup>19</sup>F NMR spectrum of compound 1.

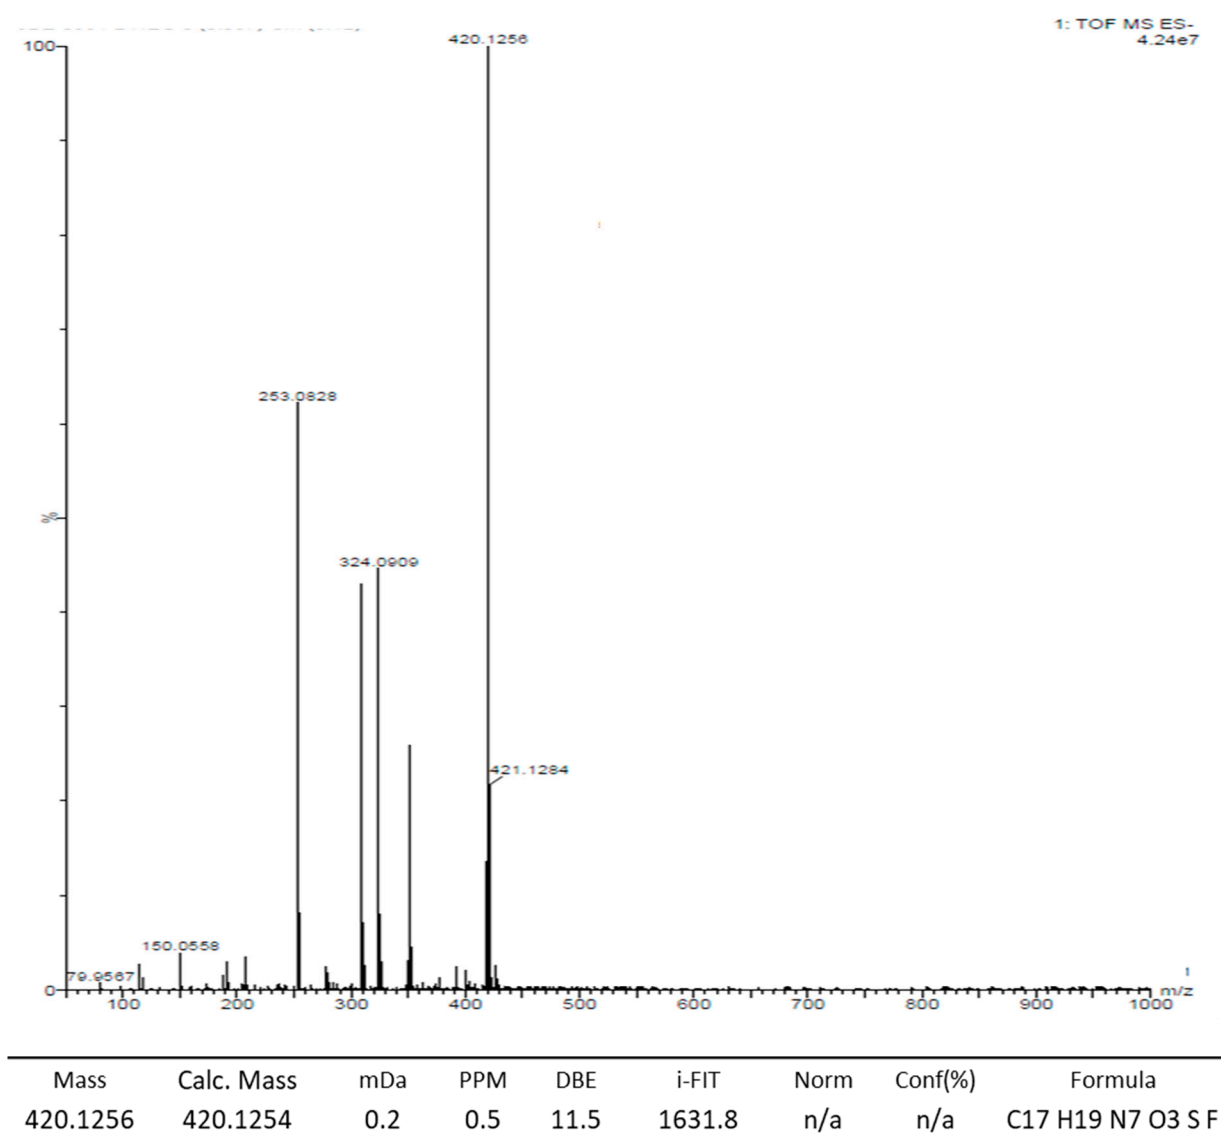

Figure S20. MS and HRMS analysis of compound 1.

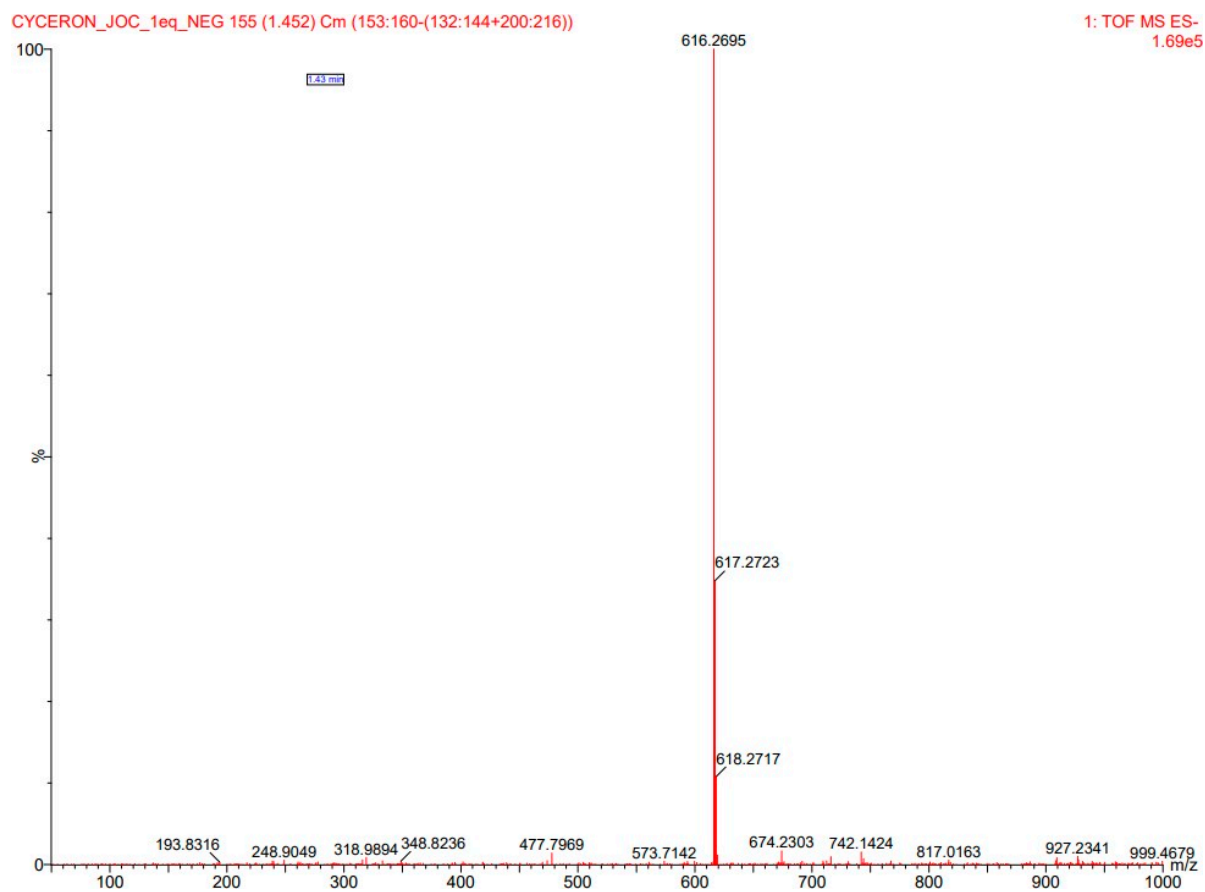

**Figure S21.** MS analysis of compound **10**.

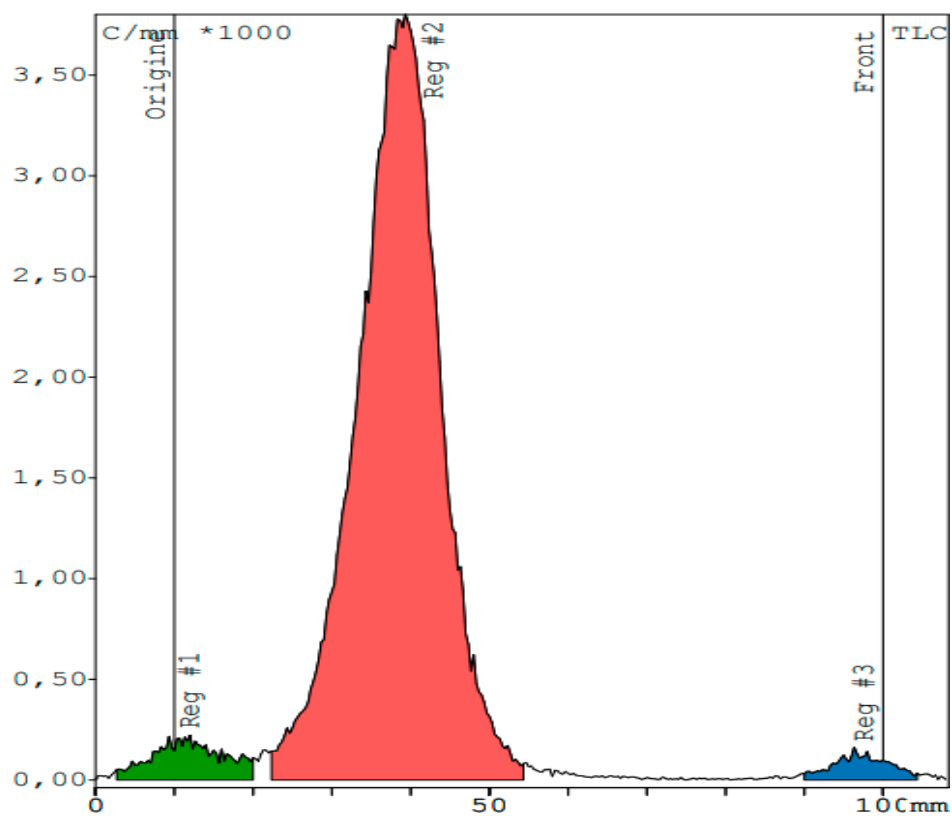

**Figure S22.** RadioTLC analysis of crude compound  $[^{18}\text{F}]\mathbf{4}$  obtained by radiofluorination of **3**.

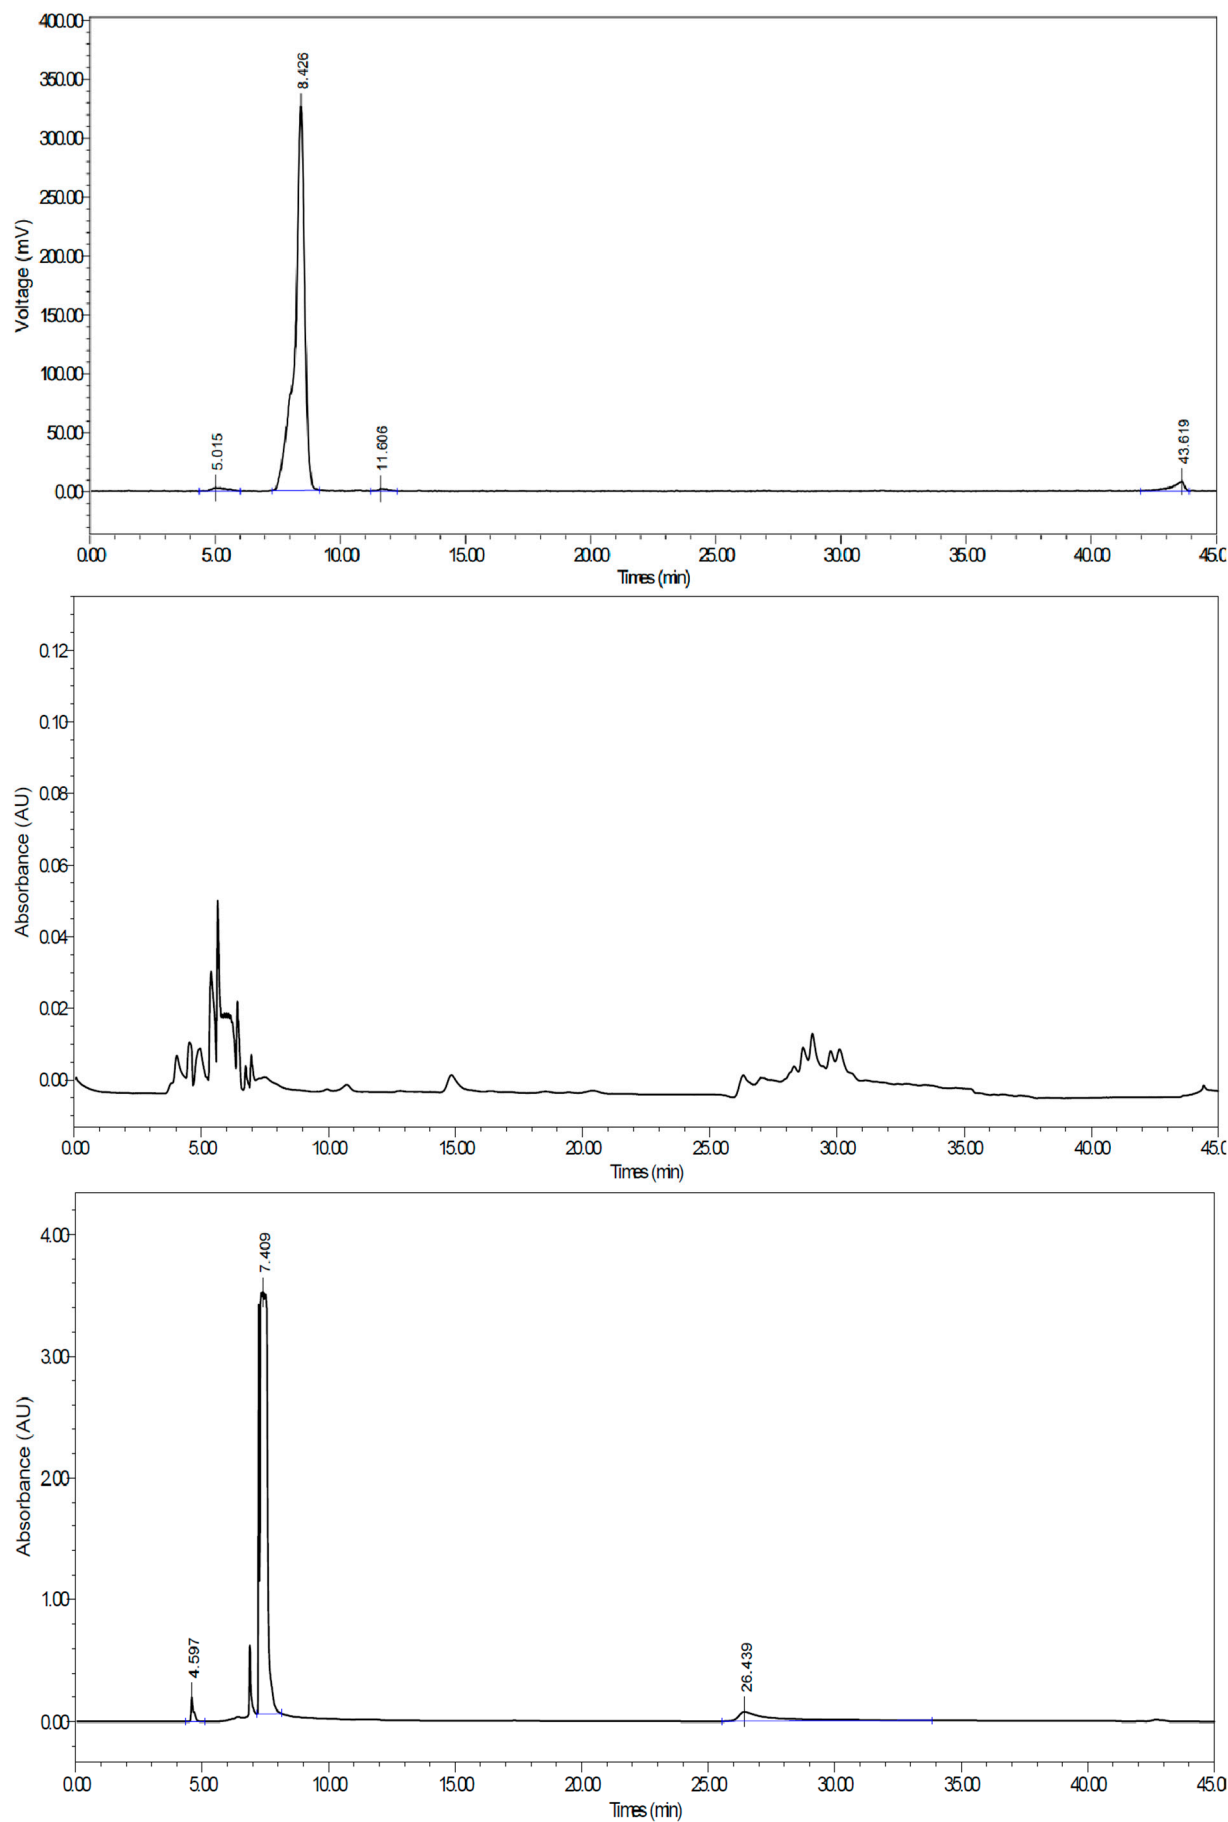

**Figure S23.** HPLC analysis of crude compound  $[^{18}\text{F}]\mathbf{4}$  obtained by radiofluorination of **3**. Top) Gamma detection, Middle) UV detection at 254 nm ; Down) UV Chromatogram of the non radioactive reference compound **4**.
